# Supplementary material
Source: Springer Nature journal article supplement (https://www.springermedizin.de/resource/supplementary/12890_2013_635_MOESM1_ESM.pdf/9505508)

**Supplementary 1.** Comparisons of obese subjects' spirometry performances before and after bronchodilator use. \*p-value smaller than 0.05; the Wilcoxon test was used.

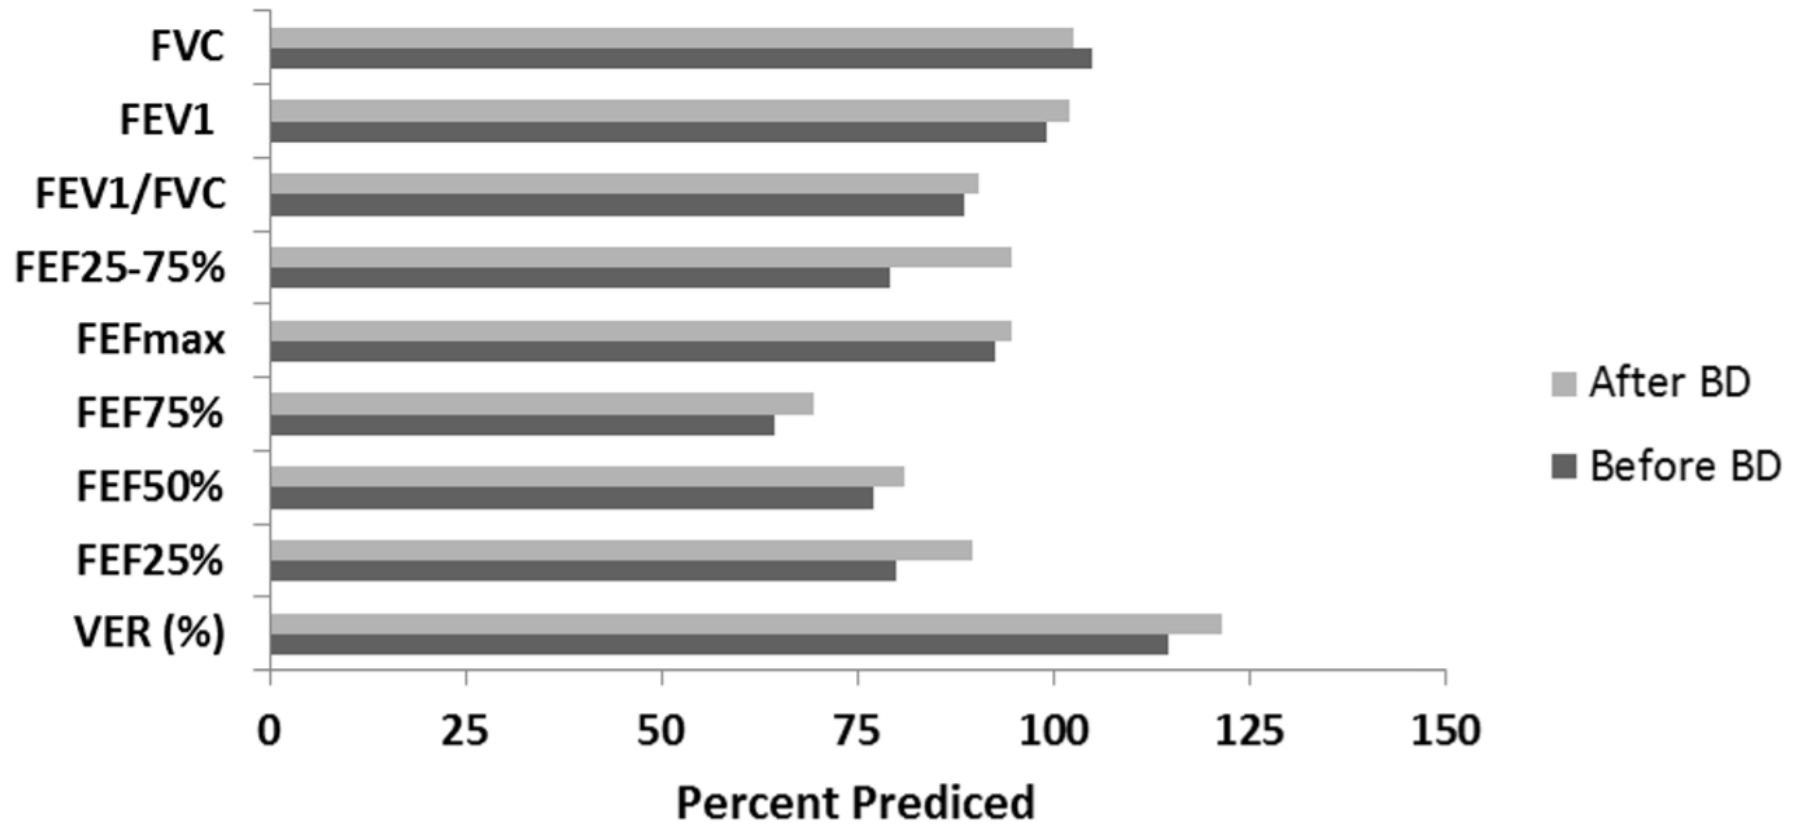

Supplement: MOESM1 [file 9505508]
